# Supplementary material for: Characterisation and comparative genomics of three new Varanus-associated Borrelia spp. from Indonesia and Australia
Source: PubMed Central journal article supplement (PMC10481545; doi:10.1186/s13071-023-05937-4), 2023-09-05
Supplement: 13071_2023_5937_MOESM1_ESM.pdf [file 13071_2023_5937_MOESM1_ESM.pdf]

Additional file 1

Table S1. Summary of Australian goanna tick samples tested for *Borrelia*

| Goanna species              | Goanna ID                     | Tick species         | Tick life stage   | Number             | Positive for <i>Borrelia</i> (%) |             |
|-----------------------------|-------------------------------|----------------------|-------------------|--------------------|----------------------------------|-------------|
| <i>Varanus varius</i> (NSW) | 1-11                          | <i>B. undatum</i>    | Female            | 4                  | 1 (25%)*                         |             |
|                             |                               | <i>B. undatum</i>    | Male              | 11                 | 2 (18.18%)*                      |             |
|                             | 2-11                          | <i>B. undatum</i>    | Female            | 4                  | 1 (25%)*                         |             |
|                             |                               | <i>B. undatum</i>    | Male              | 14                 | 1 (7.14%)*                       |             |
|                             | 4-11                          | <i>B. undatum</i>    | Female            | 5                  | 0                                |             |
|                             |                               | <i>B. undatum</i>    | Male              | 3                  | 0                                |             |
|                             | 5-11                          | <i>B. undatum</i>    | Female            | 5                  | 0                                |             |
|                             |                               | <i>B. undatum</i>    | Male              | 17                 | 0                                |             |
|                             | 7-11                          | <i>B. undatum</i>    | Female            | 1                  | 0                                |             |
|                             |                               | <i>B. undatum</i>    | Male              | 5                  | 0                                |             |
|                             | 9-11                          | <i>B. undatum</i>    | Male              | 1                  | 0                                |             |
|                             |                               | <i>B. undatum</i>    | Nymph             | 7                  | 0                                |             |
|                             | 10-11                         | <i>B. undatum</i>    | Female            | 4                  | 0                                |             |
|                             |                               | <i>B. undatum</i>    | Male              | 1                  | 0                                |             |
|                             |                               |                      | <b>Total</b>      | <b>84</b>          | <b>5 (5.95%)</b>                 |             |
|                             | <i>Varanus giganteus</i> (NT) | P9                   | <i>A. calabyi</i> | Female             | 15                               | 4 (26.67%)* |
|                             |                               |                      | <i>A. calabyi</i> | Male               | 10                               | 2 (20%)     |
|                             |                               | <i>A. limbatum</i>   | Nymph             | 2                  | 0                                |             |
| P11                         |                               | <i>A. limbatum</i>   | Nymph             | 2                  | 0                                |             |
| P12                         |                               | <i>A. calabyi</i>    | Male              | 2                  | 1 (50%)*                         |             |
| P14                         |                               | <i>A. calabyi</i>    | Female            | 1                  | 1 (100%)*                        |             |
| P20                         |                               | <i>A. calabyi</i>    | Female            | 1                  | 0                                |             |
| P22                         |                               | <i>A. calabyi</i>    | Female            | 2                  | 0                                |             |
|                             |                               | <i>A. fimbriatum</i> | Female            | 4                  | 2 (50%)*                         |             |
| P26                         |                               | <i>A. calabyi</i>    | Female            | 3                  | 0                                |             |
|                             |                               | <i>A. fimbriatum</i> | Female            | 1                  | 1 (100%)*                        |             |
|                             |                               | <i>A. limbatum</i>   | Nymph             | 12                 | 4 (33.33%)*                      |             |
| P27                         |                               | <i>A. calabyi</i>    | Female            | 1                  | 1 (100%)                         |             |
| P28                         |                               | <i>A. calabyi</i>    | Female            | 1                  | 1 (100%)                         |             |
|                             |                               | <i>A. fimbriatum</i> | Female            | 7                  | 5 (71.43%)*                      |             |
|                             |                               | <i>A. fimbriatum</i> | Male              | 12                 | 11 (91.67%)*                     |             |
| P31                         |                               | <i>A. calabyi</i>    | Female            | 1                  | 1 (100%)                         |             |
|                             |                               | <i>A. calabyi</i>    | Male              | 5                  | 2 (40%)                          |             |
| P34                         |                               | <i>A. calabyi</i>    | Female            | 2                  | 2 (100%)*                        |             |
|                             |                               | <i>A. fimbriatum</i> | Female            | 2                  | 1 (50%)                          |             |
| P36                         | <i>A. calabyi</i>             | Female               | 2                 | 1 (50%)*           |                                  |             |
| P37                         | <i>A. calabyi</i>             | Male                 | 1                 | 0                  |                                  |             |
| P38                         | <i>A. limbatum</i>            | Nymph                | 2                 | 0                  |                                  |             |
|                             |                               | <b>Total</b>         | <b>91</b>         | <b>40 (43.95%)</b> |                                  |             |
| <i>V. acanthurus</i> (WA)   | VA01                          | <i>A. limbatum</i>   | Male              | 7                  | 0                                |             |
|                             |                               | <i>A. limbatum</i>   | Female            | 1                  | 0                                |             |
|                             | VA02                          | <i>A. limbatum</i>   | Male              | 7                  | 0                                |             |
|                             | VA03                          | <i>A. limbatum</i>   | Male              | 5                  | 0                                |             |
|                             | VA04                          | <i>A. limbatum</i>   | Male              | 5                  | 0                                |             |
|                             | VA05                          | <i>A. limbatum</i>   | Male              | 2                  | 0                                |             |
|                             | VA06                          | <i>A. limbatum</i>   | Male              | 2                  | 0                                |             |
|                             | VA07                          | <i>A. limbatum</i>   | Male              | 7                  | 0                                |             |
|                             | VA08                          | <i>A. limbatum</i>   | Male              | 3                  | 0                                |             |
|                             | VA09                          | <i>A. limbatum</i>   | Male              | 3                  | 0                                |             |
|                             | VA11                          | <i>A. limbatum</i>   | Male              | 2                  | 0                                |             |
|                             | VA12                          | <i>A. limbatum</i>   | Male              | 3                  | 0                                |             |
|                             |                               | <i>A. limbatum</i>   | Female            | 1                  | 0                                |             |
| VA15                        | <i>A. limbatum</i>            | Male                 | 7                 | 0                  |                                  |             |
|                             |                               | <b>Total</b>         | <b>55</b>         | <b>0</b>           |                                  |             |

\* Indicates samples for which *flaB* and 16S rRNA amplicons were sequenced.

**Table S2.** Sequencing statistics for metagenomic sequencing of *Borrelia*

| Tick ID | Tick species        | Host ID | Host species        | Sequencing platform | Read length | Reads passing QC | <i>Borrelia</i> reads | % <i>Borrelia</i> reads |
|---------|---------------------|---------|---------------------|---------------------|-------------|------------------|-----------------------|-------------------------|
| AG58    | <i>Bot. undatum</i> | 2-11    | <i>V. varius</i>    | Illumina NextSeq    | 2 x 150 bp  | 614,334,544      | 822,237               | 0.13%                   |
| P9F1    | <i>A. calabyi</i>   | P9      | <i>V. giganteus</i> | Illumina MiSeq      | 2 x 300 bp  | 37,758,726       | 925,977               | 2.45%                   |

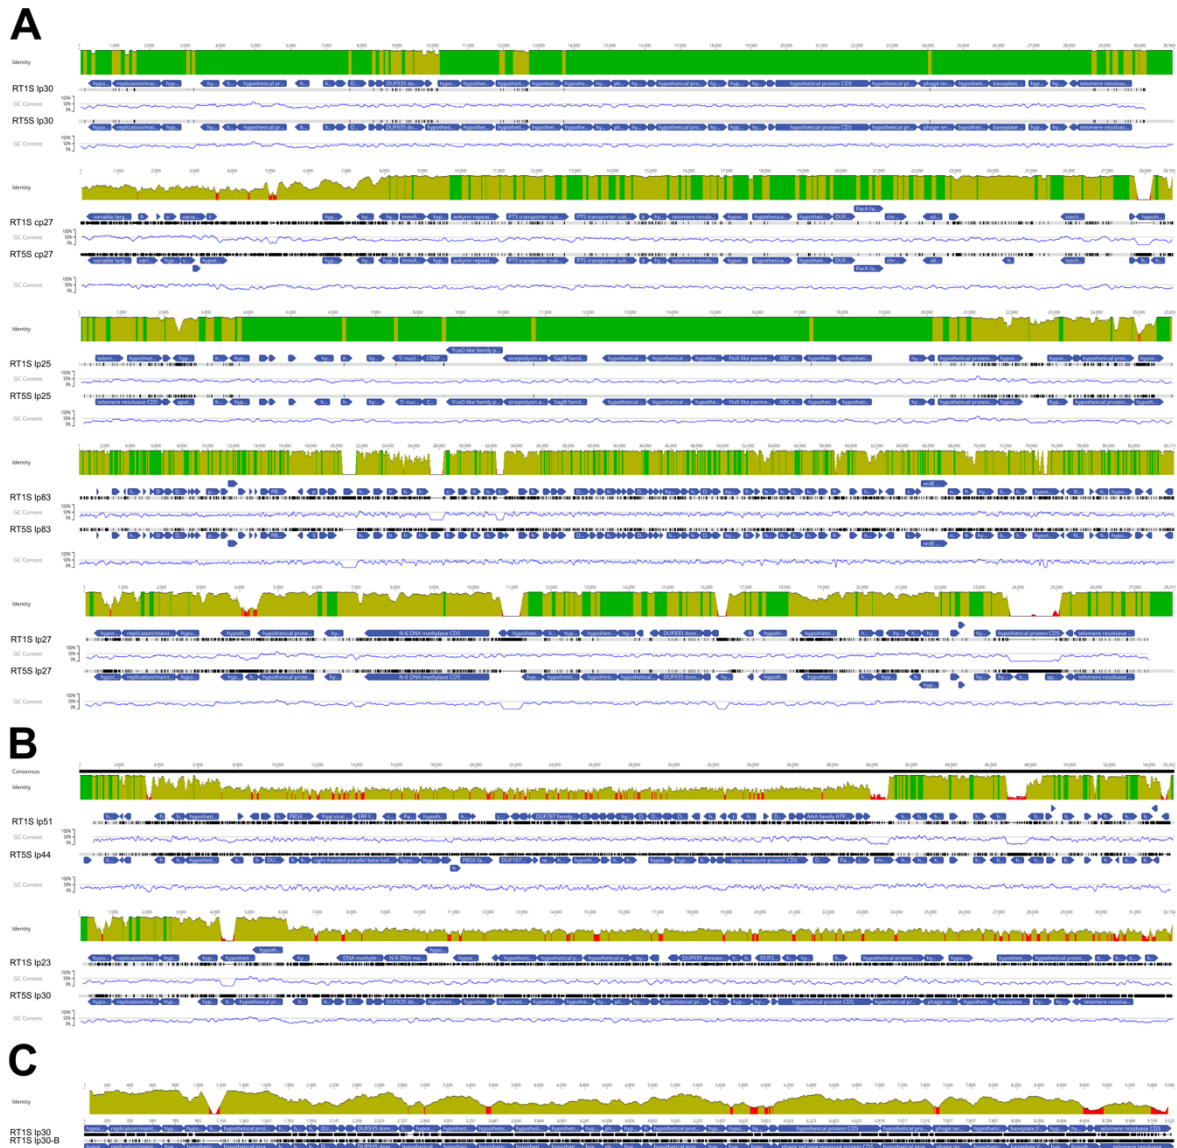

**Figure S1** Pairwise alignment plots of *Borrelia salvatorii* strains RT1S and RT5S core plasmids (A), accessory plasmids (B), and duplicated plasmids (C). Pairwise identity plots (log scale, 99 nt sliding window) are shown above each alignment, protein coding sequences are annotated in purple, and GC% plots shown below each alignment.

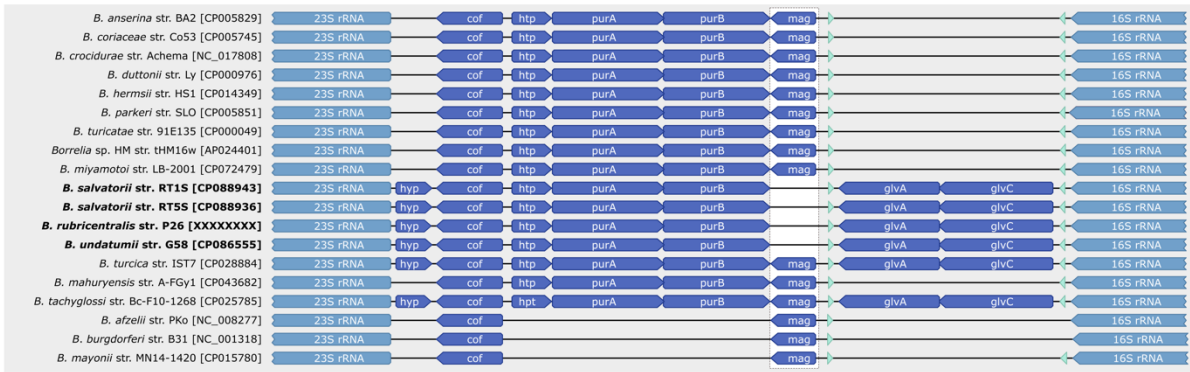

**Figure S2** Schematic alignment of the ribosomal RNA operon of RF, REP, and LB *Borrelia* highlighting the deletion of the *mag* gene, which is synaptomorphic for Varanid-associated *Borrelia* spp.

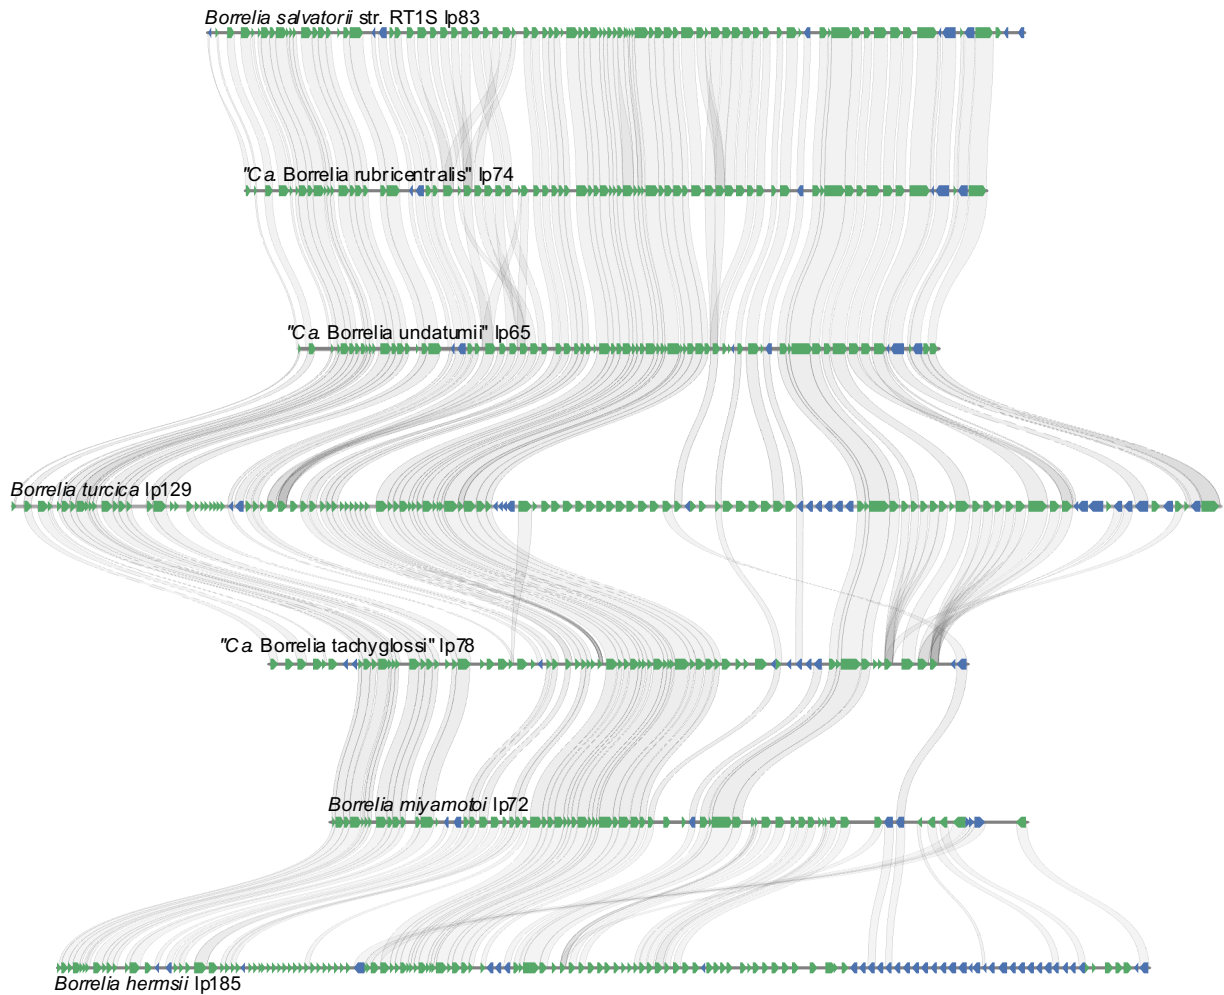

**Figure S3.** MCscan plot showing orthologous protein coding genes between relapsing fever and reptile-associated *Borrelia* linear 'megaplasms'.

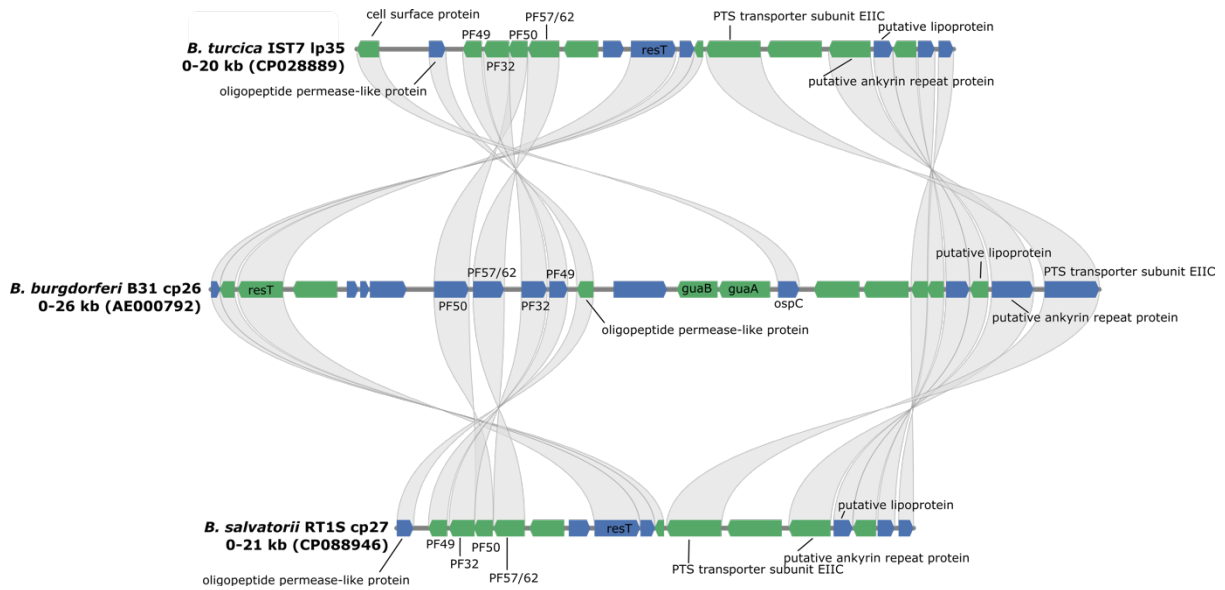

**Figure S4.** MCscan plot showing orthologous proteins coding genes between *B. burgdorferi* B31 plasmid cp26 and *B. turcica* IST7 plasmid lp25 and *B. salvatorii* RT1S cp27.

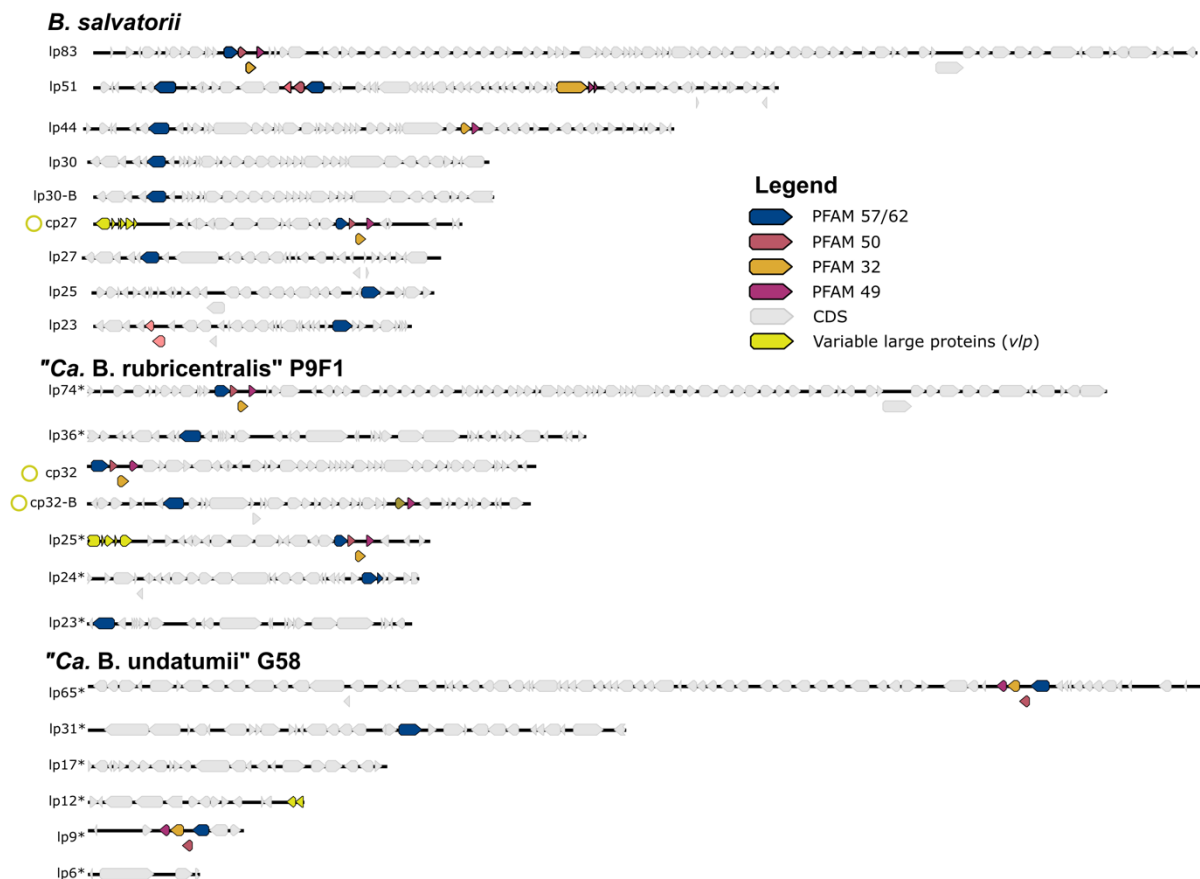

**Figure S5** Schematic of Varanid-associated *Borrelia* spp. and the approximate locations of putative plasmid partitioning genes, and variable large proteins.



**Extended caption for Fig. 5**

The isolate, ORF#, and plasmid is given for each sequence. isolate prefixes: Bsal-RT1S, *B. salvatorii* RT1S; Bsal-RT5S, *B. salvatorii* RT5S; Brub, *B. rubricentralis*; Bund, *B. undatum*; Btur, *B. turcica* IST7; BmahAFGy1, *B. mahuryensis* AFGy1; BtachBcF101268, *B. tachyglossi* BcF101268; baBA2, *B. anserina* BA2; bhDAH, *B. hermsii* DAH; bhYOR, *B. hermsii* YOR; bcCo53, *B. coriaceae* Co53; bpuSUM, *B. puertoricensis* n. sp. SUM; bpSLO, *B. parkeri* SLO; bvRMA01, *B. venezuelensis* RMA01; bt91E135, *B. turicatae* 91E135; btBTE5EL, *B. turicatae* BTE5EL; DB299, *B. bavarensis* Pbi; BBIDN127, *B. bissettii* DN12; BB, *B. burgdorferi* B31; BBUJD1, *B. burgdorferi* JD1; Bmayo, *B. mayonii* MN14-1420; AXH25, *B. miyamotoi* CT13-2396. Reference PF32 and PF57/62 sequences were sourced from [31].
